# Supplementary material for: Gas chromatography using ice-coated fused silica columns: study of adsorption of sulfur dioxide on water ice
Source: Copernicus journal article supplement (doi:10.5194/acp-18-7527-2018), 2018-05-30
Supplement: Supplementary file [file acp-18-7527-2018-supplement-title-page.pdf › acp-18-7527-2018-supplement-title-page.pdf]

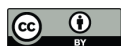

## *Supplement of*

# **Gas chromatography using ice-coated fused silica columns: study of adsorption of sulfur dioxide on water ice**

**Stefan Langenberg and Ulrich Schurath**

*Correspondence to:* Stefan Langenberg ([langenberg@uni-bonn.de](mailto:langenberg@uni-bonn.de))

- [acp-18-7527-2018-supplement-title-page.pdf](#)
- [1Dmodel.R](#)
- [2Dmodel.R](#)
- [simul\\_parameters.R](#)
- [supplement.pdf](#)

The copyright of individual parts of the supplement might differ from the CC BY 4.0 License.
